# Supplementary material for: Tuning the interactions between electron spins in fullerene-based triad systems
Source: publisher site journal article supplement (doi:10.3762/bjoc.10.31), 2014-02-05
Supplement: Additional file 1 [file 1860-5397-10-31-S1.pdf]

# Supporting Information

for

## **Tuning the interactions between electron spins in fullerene-based triad systems**

Maria A. Lebedeva<sup>1</sup>, Thomas W. Chamberlain<sup>1</sup>, E. Stephen Davies<sup>1</sup>, Bradley E. Thomas<sup>1</sup>,  
Martin Schröder<sup>1</sup> and Andrei N. Khlobystov\*<sup>1,2</sup>

Address: <sup>1</sup>School of Chemistry, University of Nottingham, Nottingham, NG7 2RD, UK and  
<sup>2</sup>Nottingham Nanoscience & Nanotechnology Centre, University of Nottingham, University  
Park, Nottingham, NG7 2RD, UK

Email: Andrei N. Khlobystov - [andrei.khlobystov@nottingham.ac.uk](mailto:andrei.khlobystov@nottingham.ac.uk)

\*Corresponding author

## **Additional spectra**

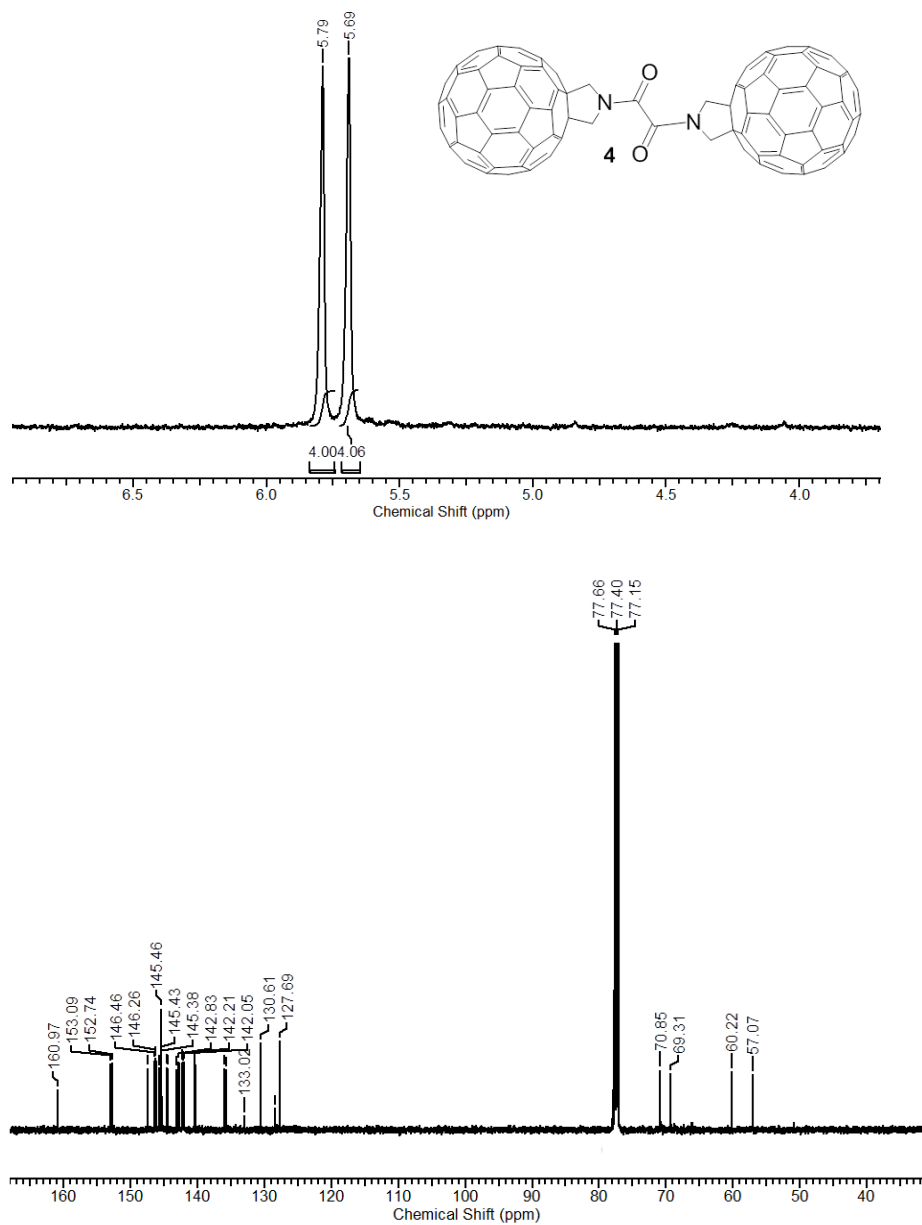

**Figure S1:**  $^1\text{H}$  (top) and  $^{13}\text{C}$  (bottom) NMR spectra of triad **4**. Spectra were recorded in a 1:1 mixture of  $\text{CS}_2$  and  $\text{CDCl}_3$ .

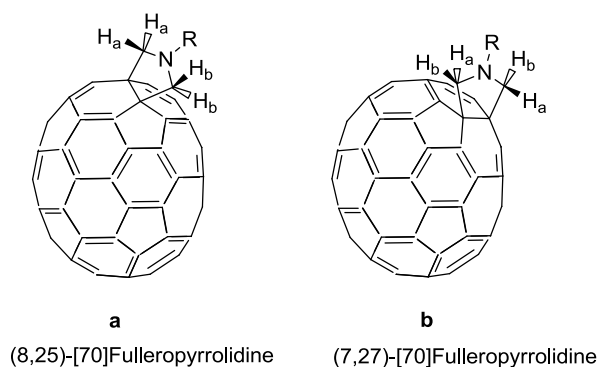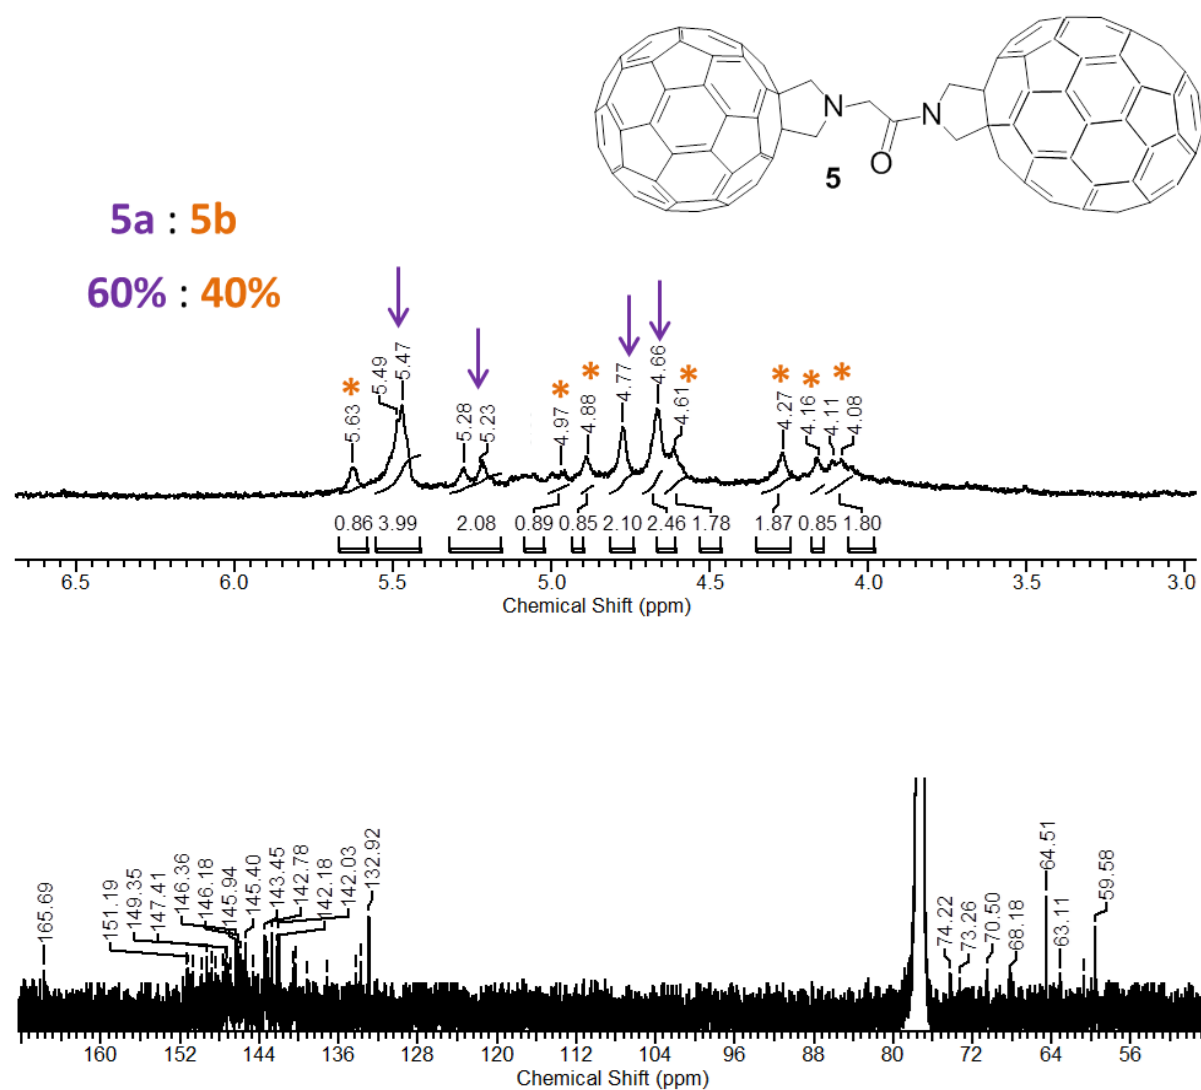

**Figure S2:** Views of (8,25) (**a**) and (7,22) (**b**) regioisomers of functionalised C<sub>70</sub> (top) and <sup>1</sup>H NMR (middle) and <sup>13</sup>C NMR (bottom) spectra of triad **5**. The spectra were recorded in a mixture of CS<sub>2</sub> and CDCl<sub>3</sub>.

6aa : 6bb : 6ab

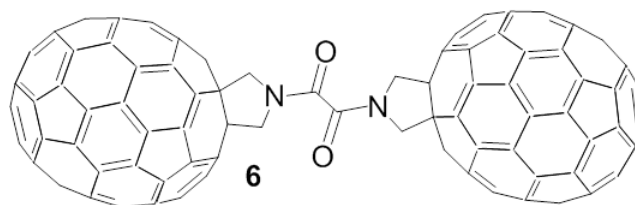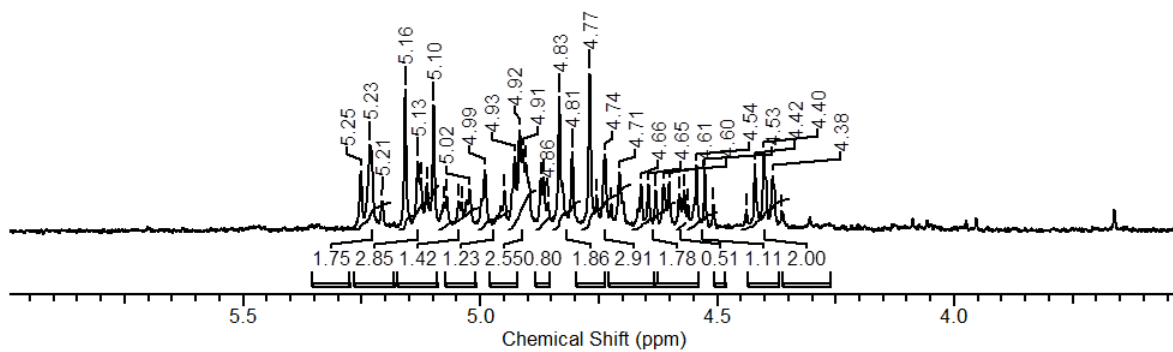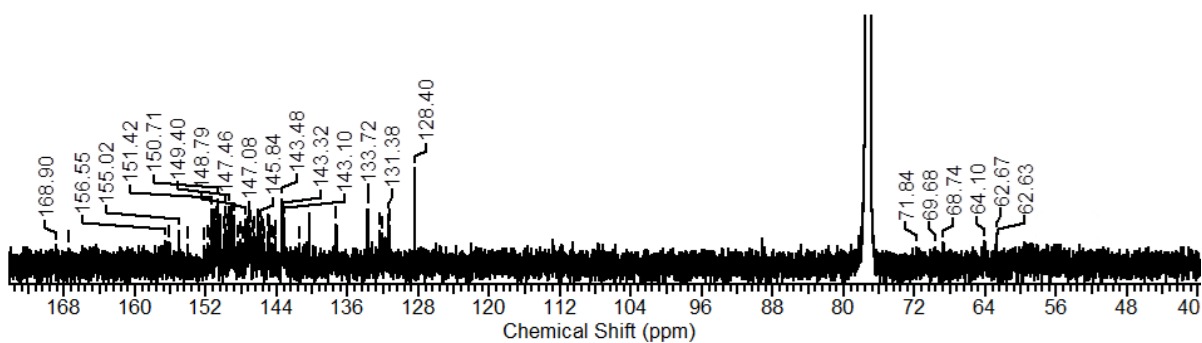

**Figure S3:**  $^1\text{H}$  NMR (top) and  $^{13}\text{C}$  NMR (bottom) spectra of triad **6**. The spectra were recorded in a mixture of  $\text{CS}_2$  and  $\text{CDCl}_3$ .

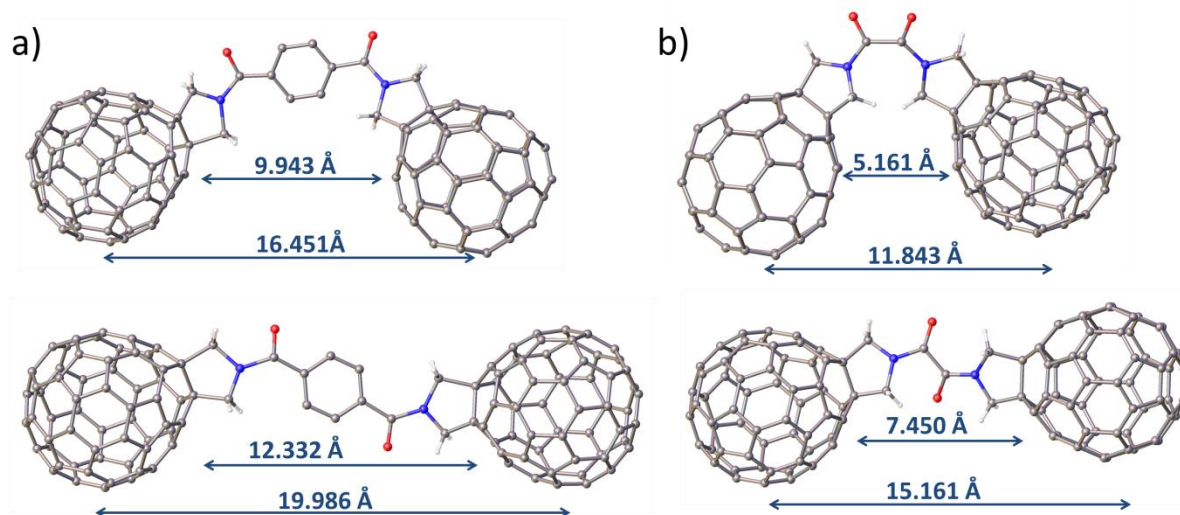

**Figure S4:** Views of shortest (top) and longest (bottom) possible conformations of fullerene dimers **1** (a) and **4** (b) showing the shortest distances between the fullerene cages and the centre-to-centre distances.

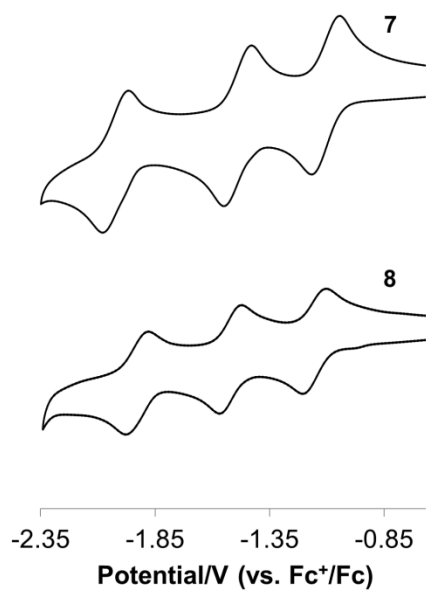

**Figure S5:** Cyclic voltammograms of **7** (top) and **8** (bottom). Scans were recorded as 0.5 mM solutions in *o*-dichlorobenzene containing 0.2 M [*n*-Bu<sub>4</sub>N][BF<sub>4</sub>] as the supporting electrolyte at a scan rate of 100 mV.

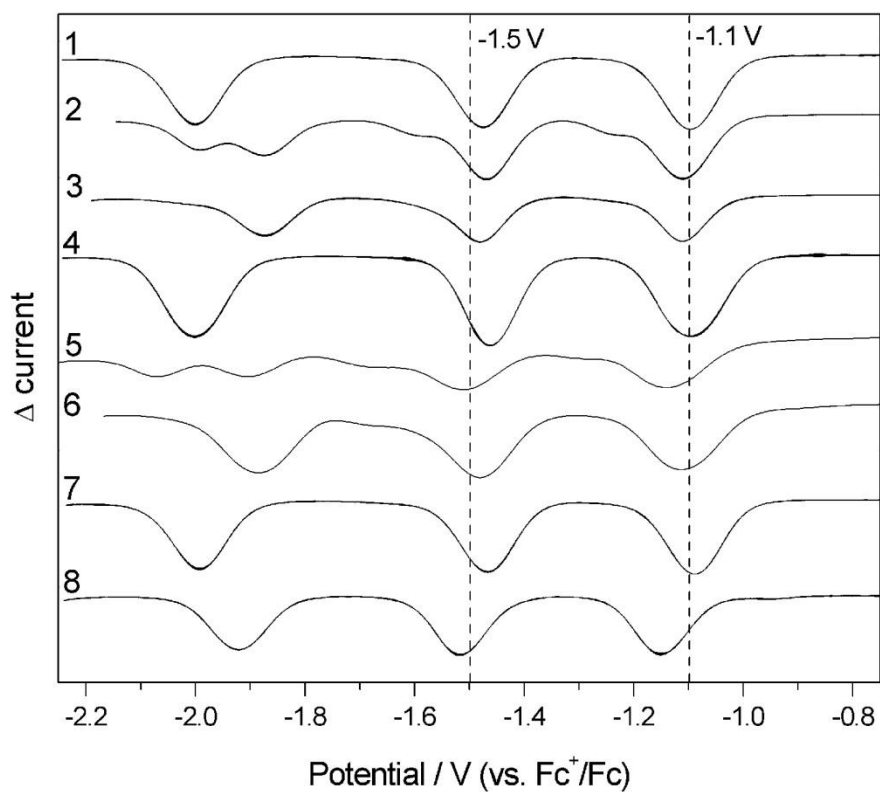

**Figure S6:** Square wave voltammograms of **1–8**. Scans were recorded as 0.5 mM solutions in *o*-dichlorobenzene containing 0.2 M [*n*-Bu<sub>4</sub>N][BF<sub>4</sub>] as the supporting electrolyte.

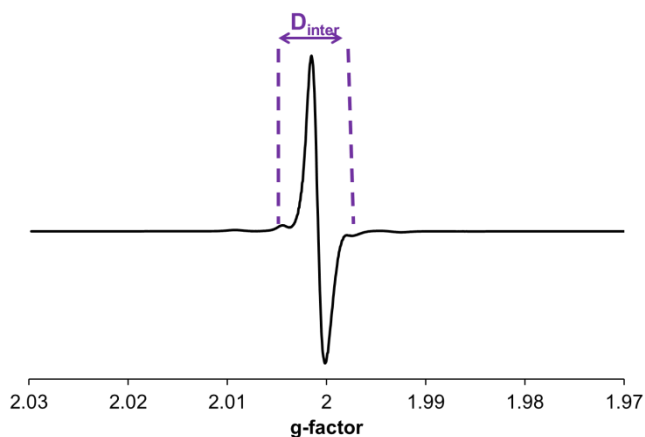

**Figure S7:** Frozen solution EPR spectrum of  $7^{1-}$  recorded at 77 K showing the central feature corresponding to the  $C_{60}^-$  and features with  $D = 9$  G corresponding to the intermolecular, or “powder” triplet. Additional small features are noted in the spectrum. The origin of these features is unclear but may result from an unidentified triplet ( $D = 26$  G).

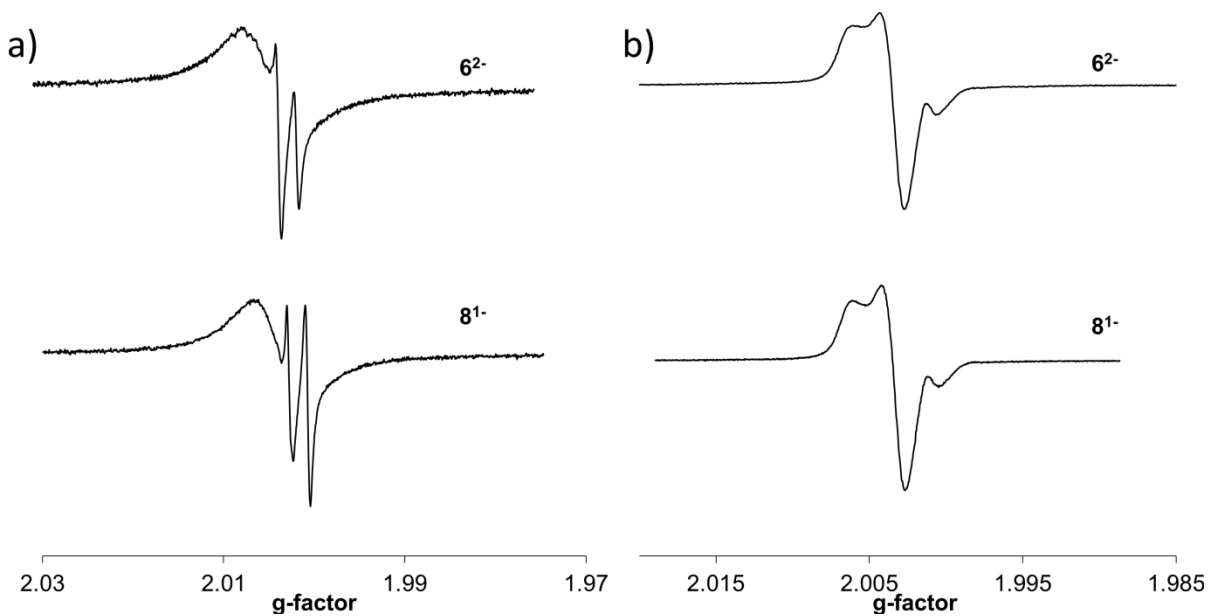

**Figure S8:** Fluid solution EPR spectra recorded at room temperature (a) and frozen solution EPR spectra recorded at 77 K (b) for  $6^{2-}$  and  $8^{1-}$ .
